# Supplementary material
Source: publisher site journal article supplement (https://www.dovepress.com/article/304651)
Supplement: Supplementary file 1 [file get_supplementary_file.php]

| **Questions from Knee injury and Osteoarthritis Outcome Score (KOOS)** | | | | |
| --- | --- | --- | --- | --- |
| **Question** | **Pre-Operation** | | **Post-Operation (UKA+ORIF)** | |
|
| Answer | Score | Answer | Score |
| **Symptoms - These questions should be answered thinking of your knee symptoms during the last week.** | | | | |
| S1. Do you have swelling in your knee? | Sometimes | 2 | Never | 4 |
| S2. Do you feel grinding, hear clicking or any other type of noise when your knee moves? | Often | 1 | Rarely | 3 |
| S3. Does your knee catch or hang up when moving? | Often | 1 | Rarely | 3 |
| S4. Can you straighten your knee fully? | Always | 4 | Always | 4 |
| S5. Can you bend your knee fully ? | Always | 4 | Always | 4 |
| **Stiffness - The following questions concern the amount of joint stiffness you have experienced during the last week in your knee. Stiffness is a sensation of restriction or slowness in the ease with which you move your knee joint.** | | | | |
| S6. How severe is your knee joint stiffness after first wakening in the morning? | Mild | 3 | Mild | 3 |
| S7. How severe is your knee stiffness after sitting, lying or resting later in the day? | Moderate | 2 | Mild | 3 |
| **Pain** | | | | |
| P1. How often do you experience knee pain? | Always | 0 | Daily | 1 |
| P2. Twisting/pivoting on your knee | Severe | 1 | Mild | 3 |
| P3. Straightening knee fully | Severe | 1 | None | 4 |
| P4. Bending knee fully | Mild | 3 | None | 4 |
| P5. Walking on flat surface | Severe | 1 | Mild | 3 |
| P6. Going up or down stairs | Severe | 1 | Mild | 3 |
| P7. At night while in bed | Moderate | 2 | Mild | 3 |
| P8. Sitting or lying | Mild | 3 | None | 4 |
| P9. Standing upright | Moderate | 2 | Mild | 3 |
| **Function, daily living - The following questions concern your physical function. By this we mean your ability to move around and to look after yourself. For each of the following activities please indicate the degree of difficulty you have experienced in the last week due to your knee.** | | | | |
| Al. Descending stairs | Severe | 1 | Moderate | 2 |
| A2. Ascending stairs | Moderate | 2 | Moderate | 2 |
| A3. Rising from sitting | Moderate | 2 | Mild | 3 |
| A4. Standing | Moderate | 2 | Mild | 3 |
| A5. Bending to floor/pick up an object | Mild | 3 | Mild | 3 |
| A6. Walking on flat surface | Moderate | 2 | Mild | 3 |
| A7. Getting in/out of car | Moderate | 2 | Mild | 3 |
| A8. Going shopping | Moderate | 2 | Moderate | 2 |
| A9. Putting on socks/stockings | Mild | 3 | Mild | 3 |
| A10. Rising from bed | Moderate | 2 | Mild | 3 |
| A11. Taking off socks/stockings | Moderate | 2 | Mild | 3 |
| A12. Lying in bed (turning over, maintaining knee position) | Moderate | 2 | Mild | 3 |
| A13. Getting in/out of bath | Moderate | 2 | Mild | 3 |
| A14. Sitting | Moderate | 2 | Mild | 3 |
| A15. Getting on/off toilet | Moderate | 2 | Mild | 3 |
| A16. Heavy domestic duties (moving heavy boxes, scrubbing floors, etc) | Severe | 1 | Severe | 1 |
| A17. Light domestic duties (cooking, dusting, etc) | Moderate | 2 | Mild | 3 |
| **Function, sports and recreational activities - The following questions concern your physical function when being active on a higher level. The questions should be answered thinking of what degree of difficulty you have experienced during the last week due to your knee.** | | | | |
| SP1. Squatting | Moderate | 2 | Moderate | 2 |
| SP2. Running | Extreme | 0 | Extreme | 0 |
| SP3. Jumping | Severe | 1 | Moderate | 2 |
| SP4. Twisting/pivoting on your injured knee | Moderate | 2 | Mild | 3 |
| SP5. Kneeling | Moderate | 2 | Moderate | 2 |
| **Quality of Life** | | | | |
| Q1. How often are you aware of your knee problem? | Constantly | 0 | Daily | 1 |
| Q2. Have you modified your life style to avoid potentially damaging activities to your knee? | Mildly | 3 | Not at all | 4 |
| Q3. How much are you troubled with lack of confidence in your knee? | Severely | 1 | Moderately | 2 |
| Q4. In general, how much difficulty do you have with your knee? | Severe | 1 | Moderately | 2 |
| **Results** | | | | |
|  | | | | |
| Sub Total Symptoms and Stiffness: | 60.71% | | 85.71% | |
| Sub Total Pain: | 38.89% | | 77.78% | |
| Sub Total Function, daily living: | 50.00% | | 67.65% | |
| Sub Total Function, sports and recreational activities: | 35.00% | | 45.00% | |
| Sub Total Quality of Life: | 31.25% | | 56.25% | |
| Total Knee Injury and Osteoarthritis Outcome Score(KOOS) | 45.8 | | 69.0 | |

**Table S1**

The results of the Knee injury and Osteoarthritis Outcome Score (KOOS) patient survey are as shown. Numerical scores were used to assess patient-reported factors before and after treatment and to evaluate the outcomes of the surgical intervention. KOOS surveys assess patient functional status, quality of life, pain levels, and ability to perform daily activities.
